# Supplementary material for: Partnering with Latino Communities for Dementia Research: A Mixed-Methods Study of Engagement
Source: Research Square preprint supplement (doi:10.21203/rs.3.rs-7458959/v1), 2025-10-01
Supplement: Supplementary file 1 [file f284290b7968e13c485254da.docx]

**Supplemental Table 1. GRIPP2 short form**

| **Section and topic** | **Item** | **Reported on page No** |
| --- | --- | --- |
| 1: Aim | The aim of this study is to engage Latino community members, caregivers, persons living with dementia, and community health workers (CHWs) as equal partners in designing, implementing, and evaluating culturally tailored dementia research engagement activities. | Background, p. 5 |
| 2: Methods | A Community Council (CC) with diverse South Texas representation co-developed community agreements, planned and implemented pláticas, participated in capacity-building workshops, and identified dementia care research priorities. Engagement was assessed using the Research Engagement Survey Tool (REST) and qualitative interviews. | Methods, Study Design, Analysis, p.5-11 |
| 3: Study results | Partners shaped study direction and ensured cultural and contextual relevance. They influenced plática design, adapted outreach strategies, and contributed to data interpretation. Quantitative findings showed significant improvements in engagement quality (e.g., community perspectives, collaborative partnerships). Qualitative results emphasized trust, shared leadership, and sustainability. | Results, p.11-21 |
| 4: Discussion and conclusions | The CC’s involvement produced culturally tailored strategies, strengthened trust, and enhanced leadership among community partners. Their input shaped both the engagement process and study outcomes, including identification of meaningful research priorities, improved partnership scores, and greater capacity for future collaboration. | Discussion, Limitations, Conclusion, p.21-22 |
| 5: Reflections/critical perspective | Community members’ lived experiences enriched the study beyond academic perspectives. Challenges included the small sample size and sustainability beyond funding. Overall, this model shows how culturally grounded, co-led engagement can reduce Latino underrepresentation in dementia research. | Discussion, Limitations, Conclusion, p.21-24 |
